# Supplementary material
Source: publisher figshare collection journal article supplement (https://adisjournals.figshare.com/articles/dataset/_/7546817)
Supplement: Supplementary file 1 [file 1]

# A survey of people's understanding about type 2 diabetes and heart disease

## WHY WAS THIS SURVEY DONE?

- This survey was done to find out what adults with type 2 diabetes (T2D) and people close to them know about the link between T2D and heart disease
  - People close to them included their relatives, friends, partners, or colleagues. They were called “SweetHearts”™ in this survey

## WHO TOOK PART IN THE SURVEY?

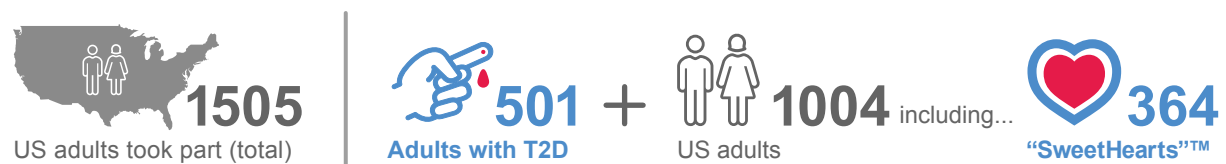

## WHAT DID THE SURVEY FIND?

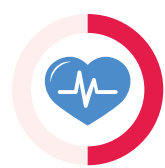

Approximately half of adults with T2D did not know that **patients with T2D are prone to heart disease and related medical problems, like a heart attack**

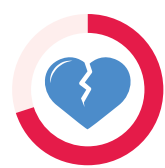

Around 7 in 10 of people with T2D and their “SweetHearts” did not know that **heart disease is the leading cause of death for people with T2D**

## MOST PEOPLE WITH T2D WERE MOTIVATED TO ADDRESS THE RISK OF HEART DISEASE

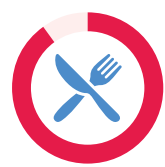

Nearly 9 out of 10 people said **they would change their diet**

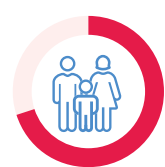

Around 7 out of 10 people said they would try to lower their risk in order to **live longer and spend more time with family**

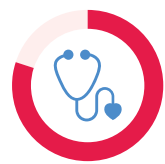

Around 8 in 10 people said they **would talk to their doctor**

## WHAT WAS THE MAIN CONCLUSION REPORTED BY THE RESEARCHERS?

- These results suggest that for people with T2D and the people close to them, the overall level of knowledge about T2D and heart disease is low.

## WHERE DO I GO FOR MORE INFORMATION?

- You can find more information about type 2 diabetes and heart disease here:  
<https://KnowDiabetesbyHeart.org/>
